# Supplementary material
Source: publisher figshare collection journal article supplement (https://future-science-group.figshare.com/ndownloader/files/28090302)
Supplement: Supplementary file 1 [file 28090302]

**Supplementary Table 1.** The sequence details of NOX family and ER stress related gene primer used in PCR.

| Name | Genbank no. | Nucleotide sequences (5’-3’) | Product size (bp) |
| --- | --- | --- | --- |
| NOX1 | NM_007052.5 | F-GGTTTTACCGCTCCCAGCAGAA | 102 |
| R-CTTCCATGCTGAAGCCACGCTT |
| NOX2 | NM_000397.4 | F-CTCTGAACTTGGAGACAGGCAAA | 132 |
| R-CACAGCGTGATGACAACTCCAG |
| NOX3 | NM_015718.3 | F-CCTGGAAACACGGATGAGTGAG | 160 |
| R-CCTCCCATAGAAGGTCTTCTGC |
| NOX4 | NM_016931.5 | F-GCCAGAGTATCACTACCTCCAC | 134 |
| R-CTCGGAGGTAAGCCAAGAGTGT |
| NOX5 | NM_024505.4 | F-GATCATCATGGAAGTCAACCT | 112 |
| R-GGTGGGGATGTTCAGATACAA |
| Bip | NM_005347.5 | F-CTGTCCAGGCTGGTGTGCTCT | 143 |
| R-CTTGGTAGGCACCACTGTGTTC |
| CHOP | NM_001195053.1 | F-GGTATGAGGACCTGCAAGAGGT | 163 |
| R-CTTGTGACCTCTGCTGGTTCTG |
| PERK | NM_004836.7 | F-GTCCCAAGGCTTTGGAATCTGTC | 109 |
| R-CCTACCAAGACAGGAGTTCTGG |
| IRE1α | NM_001433.5 | F-CCGAACGTGATCCGCTACTTCT | 111 |
| R-CGCAAAGTCCTTCTGCTCCACA |
| GAPDH | NM_002046.7 | F-GTCTCCTCTGACTTCAACAGCG | 131 |
| R-ACCACCCTGTTGCTGTAGCCA |
